# Supplementary material for: A V-doped W3Nb14O44 anode in a Wadsley–Roth structure for ultra-fast lithium-ion half/full batteries
Source: Royal Society of Chemistry journal article supplement (doi:10.1039/d3nj03462c), 2023-01-01
Supplement: d3nj03462c1.pdf [file d3nj03462c1.pdf]

Electronic Supplementary Material (ESI) for  
This journal is © The Royal Society of Chemistry 2023

## Supporting Information

### A V-Doped $W_3Nb_{14}O_{44}$ Anode in Wadsley-Roth Structure for Ultra-Fast

#### Lithium-Ion Half/Full Batteries

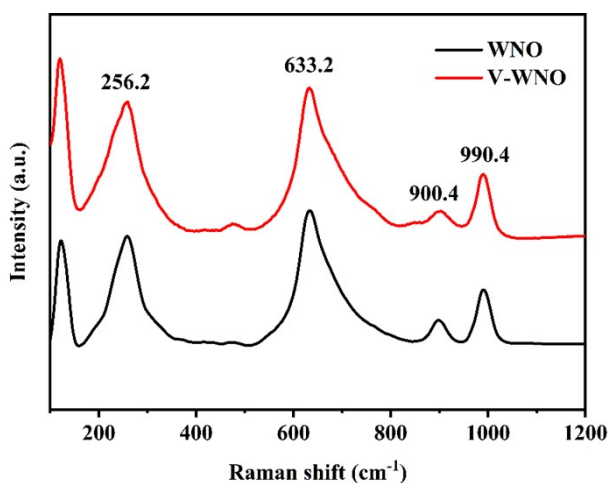

Fig. S1 Raman spectra for V-WNO and WNO.

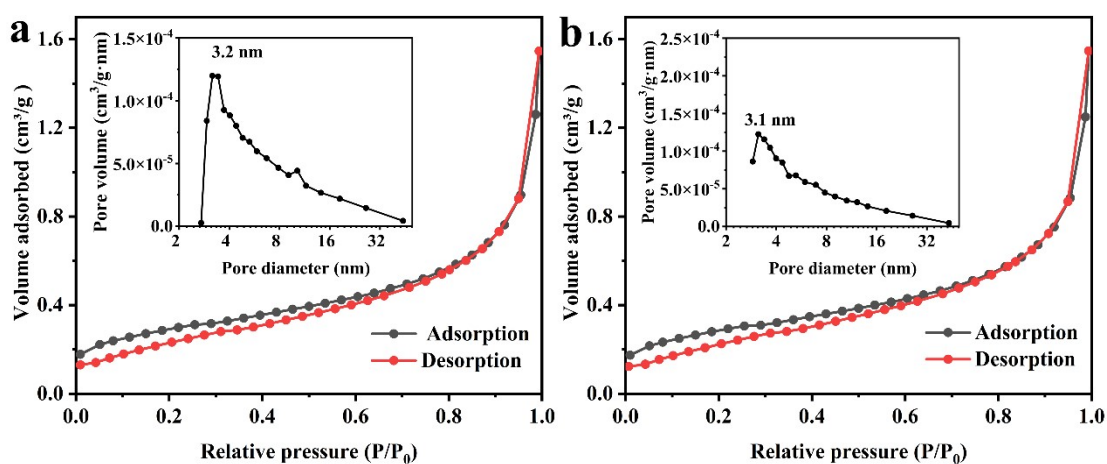

Fig. S2 Nitrogen adsorption-desorption isotherm and the inset displaying the corresponding pore size distribution curve for (a) V-WNO and (b) WNO.

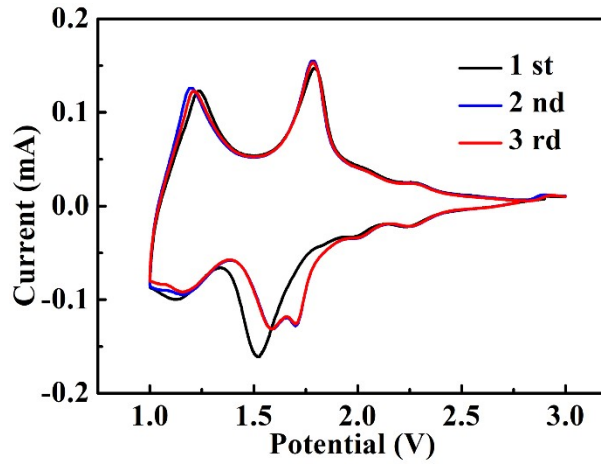

Fig. S3 CV curves of V-WNO for the first 3 cycles at a scan rate of  $0.1 \text{ mV s}^{-1}$ .

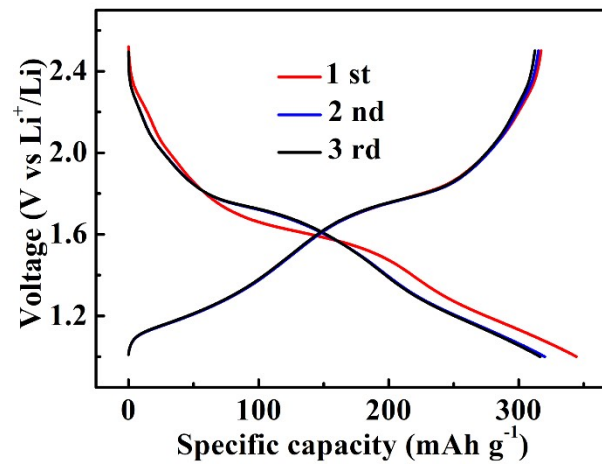

Fig. S4 Galvanostatic charge-discharge profiles of V-WNO at 0.5 C.
